# Supplementary material for: Cancer cell-soluble factors reprogram mesenchymal stromal cells to slow cycling, chemoresistant cells with a more stem-like state
Source: PubMed Central journal article supplement (PMC5688803; doi:10.1186/s13287-017-0709-9), 2017-11-07
Supplement: 13287_2017_709_MOESM1_ESM.pdf [file 13287_2017_709_MOESM1_ESM.pdf]

**A****MCF7 CiSCs**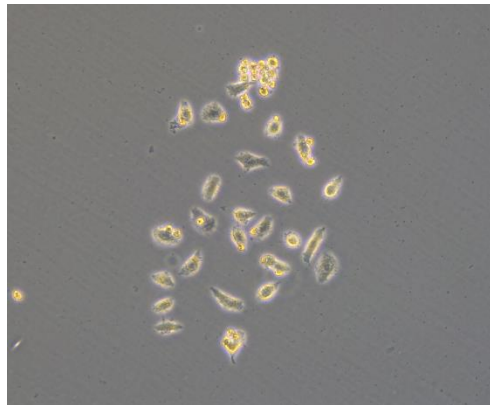**Hela CiSCs**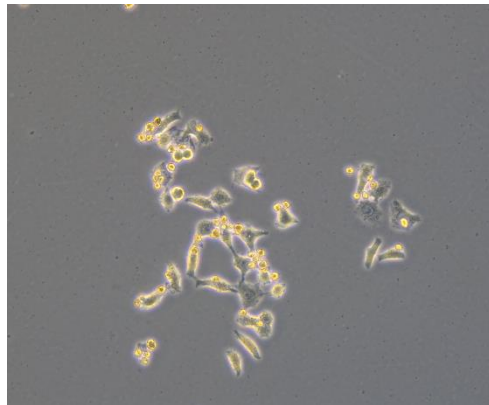**HepG2 CiSCs**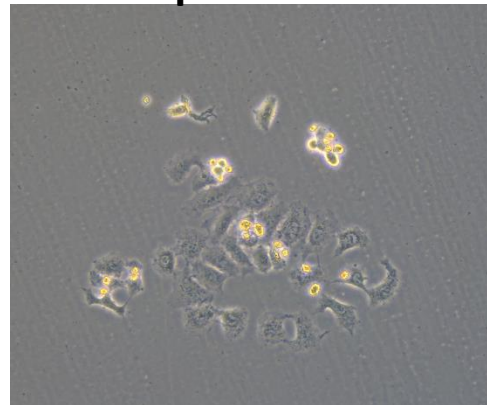**B****MCF7 CiSCs**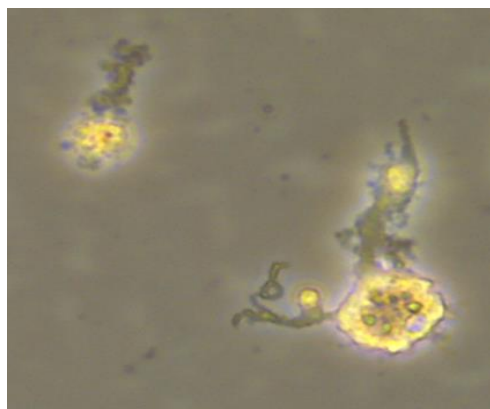**Day 7****Hela CiSCs**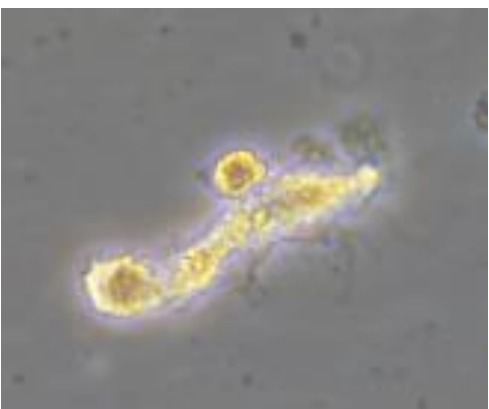**HepG2 CiSCs**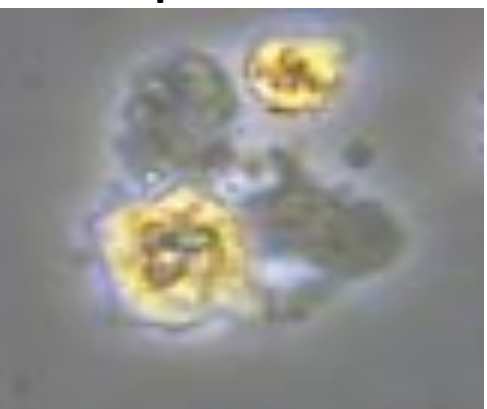**Day 14**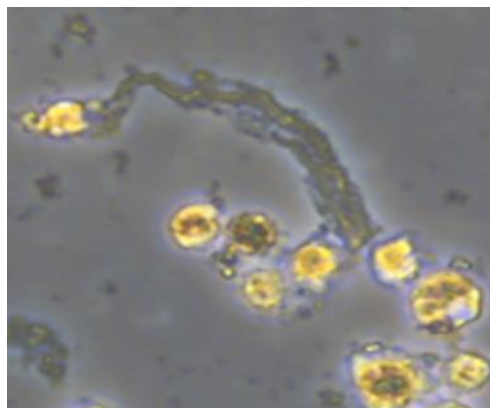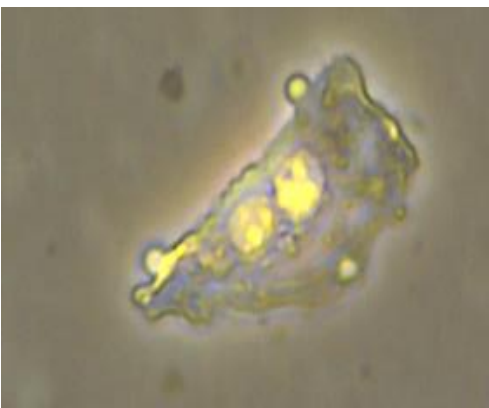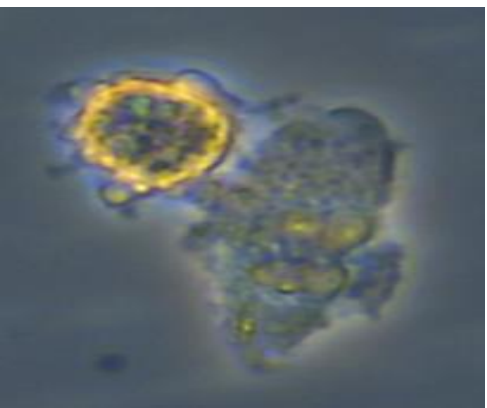**C****Supplementary Figure 1**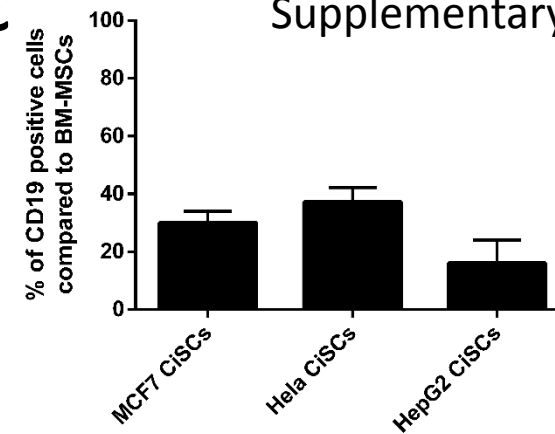**D**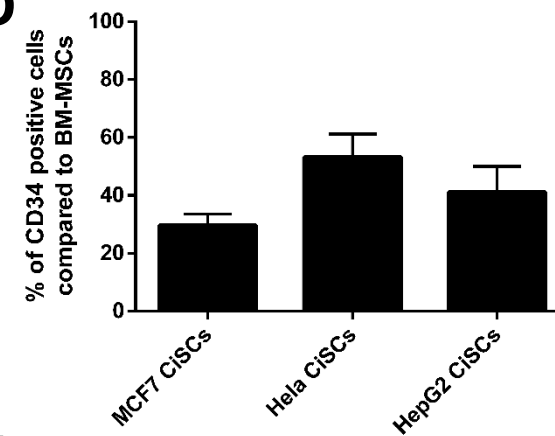**E**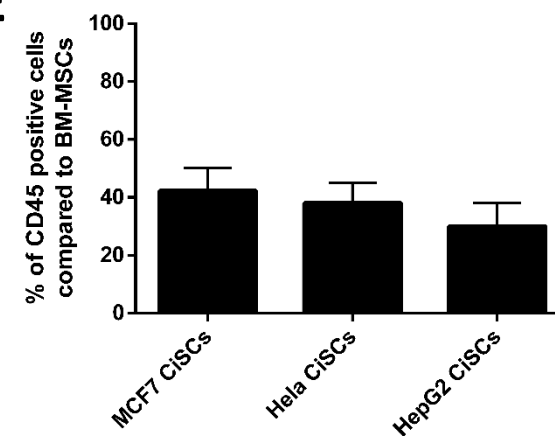

**A**  
Kidney after  
xenotransplantation

**BM-MSCs**

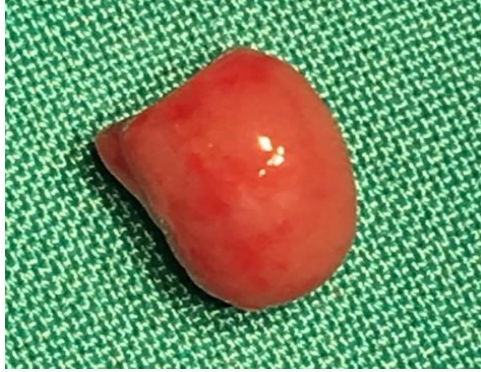

**MCF7 CiSCs**

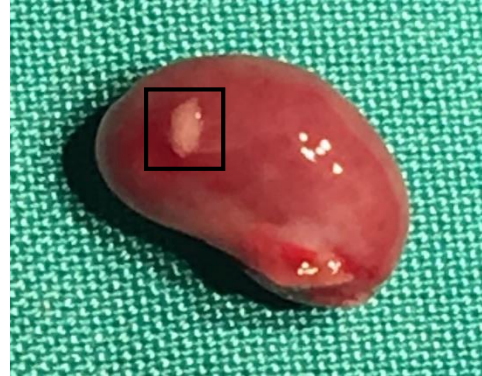

**Hela CiSCs**

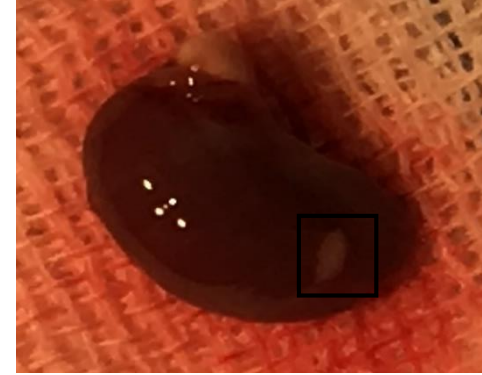

**HepG2 CiSCs**

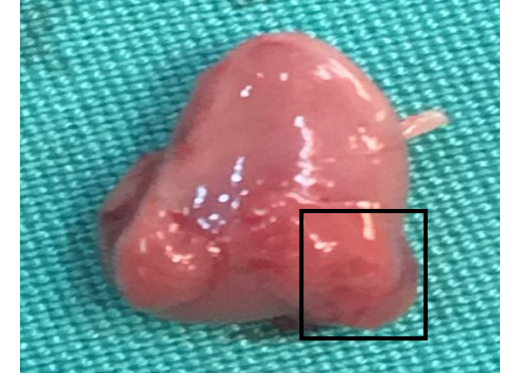

**B**

H & E Staining

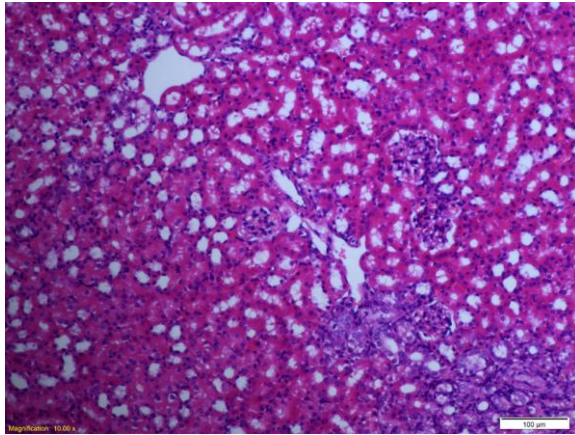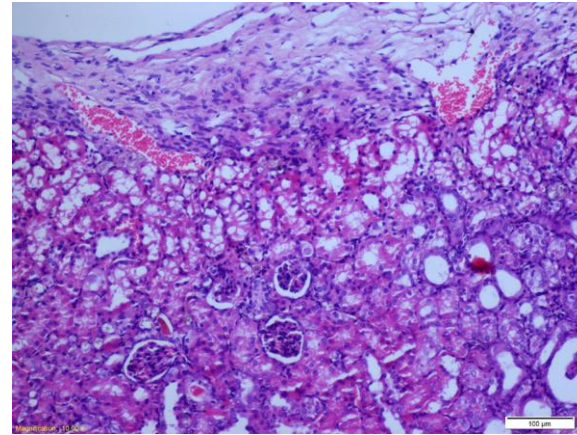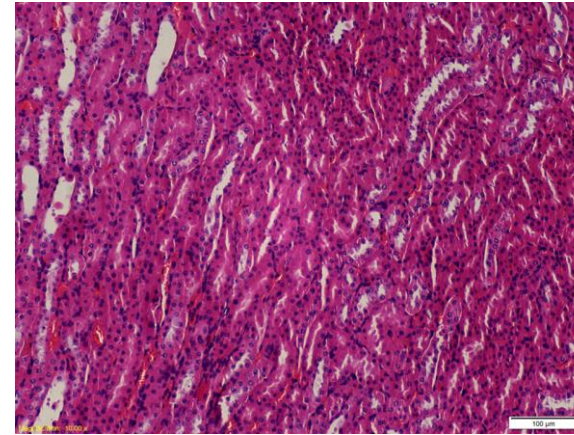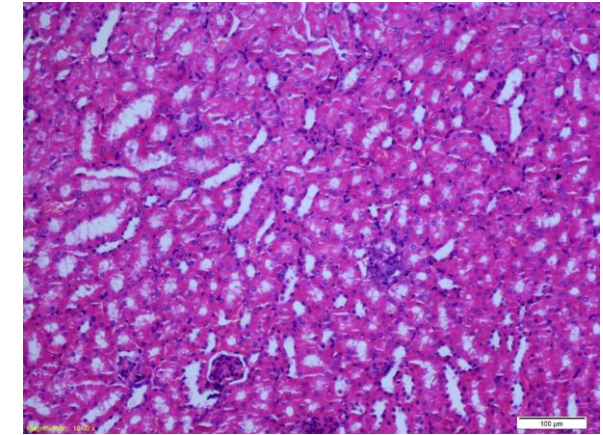

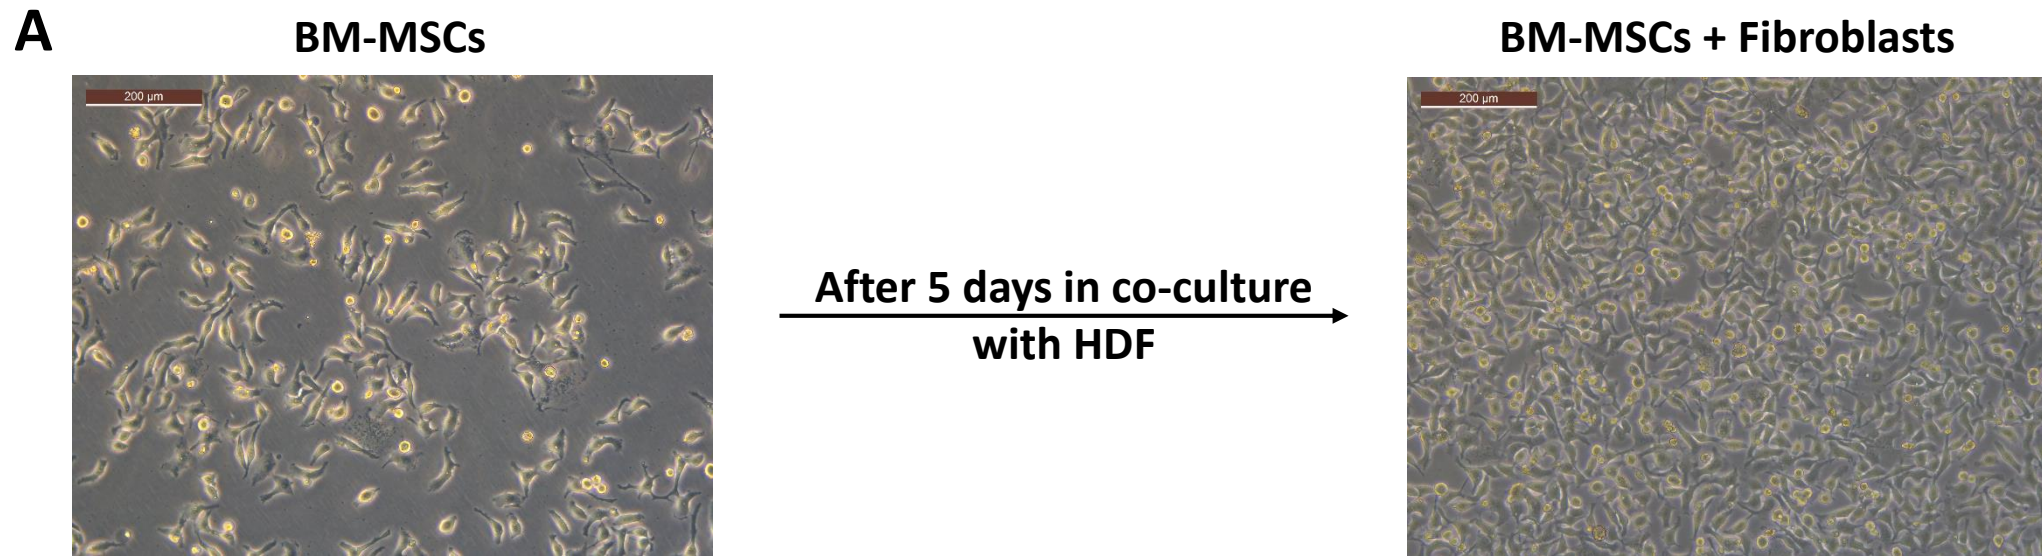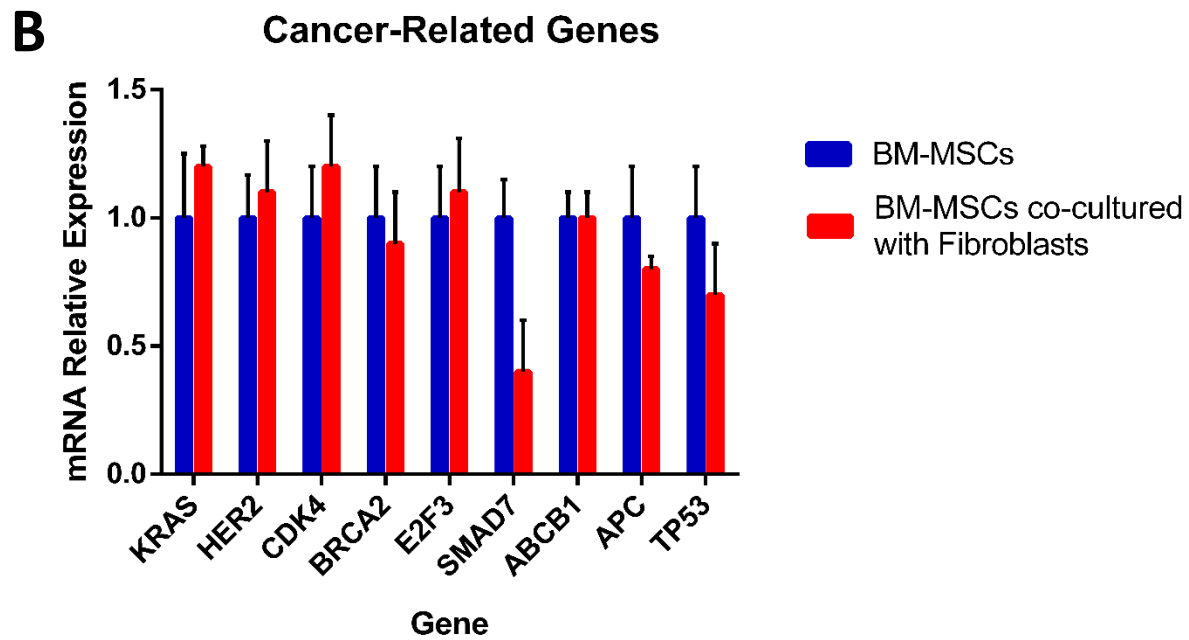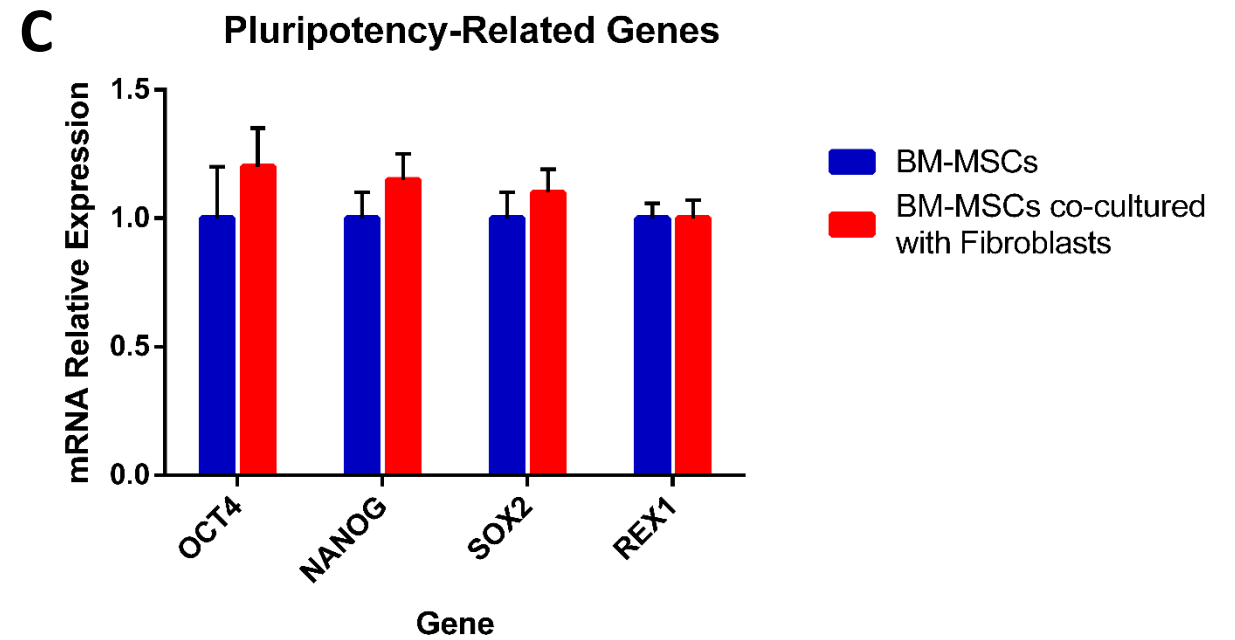

**Supplementary Figure 1: In vitro differentiation of CiSCs.**

(A) Representative morphological analysis of CiSCs differentiation following exposure to 10% FBS for up to 3 weeks in adherent-mediated flasks.

(B) Phase-contrast images of CiSCs differentiation in matrigel (7-14 days) showing the formation of complex secondary structures.

(C-E) Quantification of the percentage of (C) CD19 (D) CD34 and (E) CD45 positive cells compared to the parental BM-MSCs by flow cytometry staining. Proportions of positive cells were measured by subtracting the control parental BM-MSCs staining from test histograms using super-enhanced Dmax (SED) normalized subtraction using FlowJo v. 10.2 software. Data are represented as mean  $\pm$  SD.

**Supplementary Figure 2: Xenotransplantation of CiSCs under the kidney capsule of nude mice.**

(A) Representative images of kidneys of nude mice after 2 months following xenotransplantation of CiSCs.

(B) H&E staining of paraffin-embedded sections of kidneys of nude mice after 2 months following xenotransplantation of CiSCs.

**Supplementary Figure 3: Effect of co-culturing BM-MSCs with Human Dermal Fibroblasts.**

(A) Phase-contrast images of BM-MSCs at day 0 and after 5 days following co-culture

(B-C) Real-time qRT-PCR analysis of (B) cancer-related genes and (C) pluripotency-related genes in BM-MSCs following 5 days of co-culture with HDF.  $\beta$ -actin mRNA was used to normalize the variability in template loading. The data are reported as mean  $\pm$  SD.

**Supplementary Table S1: Sequence of Primers used**

| <b>Gene Name</b>             | <b>Primer Sequence</b>     |
|------------------------------|----------------------------|
| Human $\beta$ -actin Forward | AGAGCTACGAGCTGCCTGAC       |
| Human $\beta$ -actin Reverse | AGCACTGTGTTGGCGTACAG       |
| Human APC Forward            | AGCCATGCCAACAAAGTCATCACG   |
| Human APC Reverse            | TTCCTTGCCACAGGTGGAGGTA     |
| Human CDK4 Forward           | TCGAAAGCCTCTCTTCTGTG       |
| Human CDK4 Reverse           | TACATCTCGAGGCCAGTCAT       |
| Human TP53 Forward           | GTTCCGAGAGCTGAATGAGG       |
| Human TP53 Reverse           | TTATGGCGGGAGGTAGACTG       |
| Human E2F3 Forward           | GAGACTGAAACACACAGTCC       |
| Human E2F3 Reverse           | CCTGAGTTGGTTGAAGCC         |
| Human SMAD7 Forward          | AGAAGGTGCGGAGCAAAAT        |
| Human SMAD7 Reverse          | GTGTGGCGGACTTGATGA         |
| Human ABCB1 Forward          | AAATTGGCTTGACAAGTTGTATATGG |
| Human ABCB1 Reverse          | CACCAGCATCATGAGAGGAAGTC    |
| Human BRCA2 Forward          | CGAGCTTCTGAAACTAGGC        |
| Human BRCA2 Reverse          | CTTTGTTGCAGCGTGTCTTA       |
| Human HER2 Forward           | ATCTGCCTGACATCCACG         |
| Human HER2 Reverse           | GCAATCTGCATACACCAGTTC      |

|                       |                             |
|-----------------------|-----------------------------|
| Human KRAS Forward    | TGTTCAAAAGGTTTTGTCTCC       |
| Human KRAS Reverse    | CCTTATAATAGTTTCCATTGCCTTG   |
| Human ALDH1A1 Forward | CGCAAGACAGGCTTTTCAG         |
| Human ALDH1A1 Reverse | TGTATAATAGTCGCCCCCTCTC      |
| Human CD44 Forward    | AGAAGGTGTGGGCAGAAGAA        |
| Human CD44 Reverse    | AAATGCACCATTTCTGAGA         |
| Human ABCG2 Forward   | TTCCAAGCGTTCATTCAAAAA       |
| Human ABCG2 Reverse   | TACGACTGTGACAATGATCTGAGC    |
| Human PTEN Forward    | CAAGATGATGTTTGAACTATTCCAATG |
| Human PTEN Reverse    | CCTTTAGCTGGCAGACCACAA       |
| Human CD90 Forward    | TCAGGAAATGGCTTTTCCCA        |
| Human CD90 Reverse    | TCCTCAATGAGATGCCATAAGCT     |
| Human Nestin Forward  | AGCGTTGGAACAGAGGTTGGA       |
| Human Nestin Reverse  | TGTTTCCTCCCACCCTGTGTC       |
| Human CD24 Forward    | TGCTCCTACCCACGCAGATT        |
| Human CD24 Reverse    | GGCCAACCCAGAGTTGGAA         |
| Human EpCAM Forward   | CGCAGCTCAGGAAGAATGTG        |
| Human EpCAM Reverse   | TGAAGTACACTGGCATTGACG       |
| Human Oct4 Forward    | TGTA CTCTCGGTCCCTTTC        |
| Human Oct4 Reverse    | TCCAGGTTTTCTTCCCTAGC        |

|                          |                         |
|--------------------------|-------------------------|
| Human Sox2 Forward       | GCTAGTCTCCAAGCGACGAA    |
| Human Sox2 Reverse       | GCAAGAAGCCTCTCCTTGAA    |
| Human Nanog Forward      | CAGTCTGGACACTGGCTGAA    |
| Human Nanog Reverse      | CTCGCTGATTAGGCTCCAAC    |
| Human Rex1 Forward       | GCGTACGCAAATTAAGTCCAGA  |
| Human Rex1 Reverse       | ATCCTAACAGCTCGCAGAAT    |
| Human hTERT Forward      | CGGAAGAGTGTCTGGAGCAA    |
| Human hTERT Reverse      | GGATGAAGCGGAGTCTGGA     |
| Human Bcl-2 Forward      | GGATAACGGAGGCTGGGATG    |
| Human Bcl-2 Reverse      | TGACTTCACTTGTGGCCCAG    |
| Human Bax Forward        | CAAACGGTGCTCAAGGCC      |
| Human Bax Reverse        | GAGACAGGGACATCAGTCGC    |
| Human PARP Forward       | AGCGTGTTTCTAGGTCGTGG    |
| Human PARP Reverse       | CATCAAACATGGGCGACTGC    |
| Human N-Cadherin Forward | GGTGGAGGAGAAGAAGACCAG   |
| Human N-Cadherin Reverse | GGCATCAGGCTCCACAGT      |
| Human SNAIL Forward      | ACCACTATGCCGCGCTCTT     |
| Human SNAIL Reverse      | GGTCGTAGGGCTGCTGGAA     |
| Human ZEB1 Forward       | GATGATGAATGCGAGTCAGATGC |
| Human ZEB1 Reverse       | CTGGTCCTCTTCAGGTGCC     |

|                                   |                                 |
|-----------------------------------|---------------------------------|
| Human Twist1 Forward              | CGGGAGTCCGCAGTCTTA              |
| Human Twist1 Reverse              | GCTTGAGGGTCTGAATCTTG            |
| Human Occludin Forward            | CATTGCCATCTTTGCCTGTG            |
| Human Occludin Reverse            | AGCCATAACCATAGCCATAGC           |
| Human Desmoplakin Forward         | CAGTGGTGTGTCAGCGATGATGT         |
| Human Desmoplakin Reverse         | TGACGCTGGATATGGTGGAA            |
| Human E-Cadherin Forward          | GTCACTGACACCAACGATAATCCT        |
| Human E-Cadherin Reverse          | TTTCAGTGTGGTGATTACGACGTTA       |
| Human FOXA2 Forward               | CCGTTCTCCATCAACAACCT            |
| Human FOXA2 Reverse               | GGGGTAGTGCATCACCTGTT            |
| Human AFP Forward                 | AGCAGCTTGTTAAATCAACATGCA        |
| Human AFP Reverse                 | AAAATTAACCTTGGTAAACTTCTGACTCAGT |
| Human SOX17 Forward               | CGCTTTCATGGTGTGGGCTAAGGACG      |
| Human SOX17 Reverse               | TAGTTGGGGTGGTCCTGCATGTGCTG      |
| Human $\beta$ III-tubulin Forward | GCTCAGGGGCCTTTGGACATCTCTT       |
| Human $\beta$ III-tubulin Reverse | TTTTCACACTCCTTCCGCACCACATC      |
| Human GFAP Forward                | AGAAGCTCCAGGATGAAACC            |
| Human GFAP Reverse                | AGCGACTCAATCTTCCTCTC            |
| Human PAX6 Forward                | TGGTATTCTCTCCCCCTCCT            |
| Human PAX6 Reverse                | TAAGGATGTTGAACGGGCAG            |



|                    |                       |
|--------------------|-----------------------|
| Human MSX1 Forward | CCTCTTTGCTCCCTGAGTTCA |
| Human MSX1 Reverse | GGGACTCTCCAGCCACTTTT  |
